# Supplementary material for: Biodegradable 3D Printed Scaffolds of Modified Poly (Trimethylene Carbonate) Composite Materials with Poly (L-Lactic Acid) and Hydroxyapatite for Bone Regeneration
Source: MDPI journal article supplement (doi:10.3390/nano11123215), 2021-11-26
Supplement: s1 [file s1]

## Supporting information

# Biodegradable 3D Printed Scaffolds of Modified Poly (Trimethylene Carbonate) Composite Materials with Poly (L-Lactic Acid) and Hydroxyapatite for Bone Regeneration

Honglei Kang <sup>1,2,†</sup>, Xudong Jiang <sup>1,†</sup>, Zhiwei Liu <sup>1</sup>, Fan Liu <sup>1,\*</sup>, Guoping Yan <sup>1,\*</sup> and Feng Li <sup>2</sup>

<sup>1</sup> School of Materials Science and Engineering, Wuhan Institute of Technology, Wuhan 430205, China;

kanghonglei@hust.edu.cn (H.K.); polymers2012@163.com (X.J.);

polymers20121016@sohu.com (Z.L.)

<sup>2</sup> Department of Orthopaedics, Tongji Medical College, Huazhong University of Science and Technology, Wuhan 430022, China; lifengmd@hust.edu.cn

\* Correspondence: Fan.liu@wit.edu.cn (F.L.); guopingyan@wit.edu.cn (G.Y.); Tel.: +86-27-65520-576

† These authors contributed equally to this work.

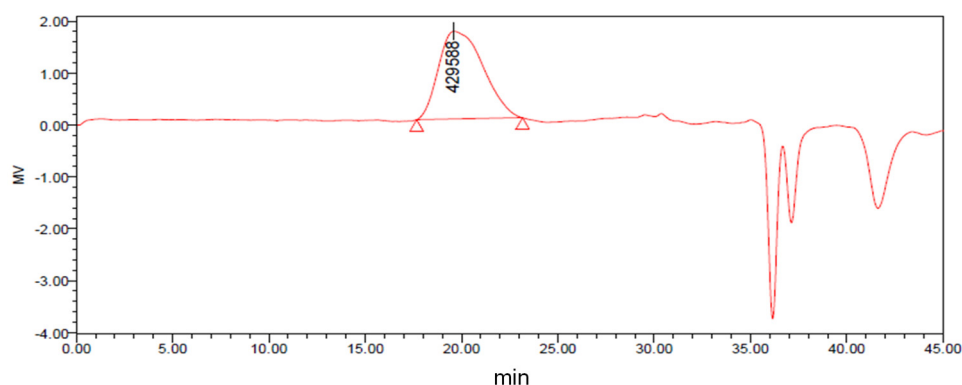

| Mn     | Mw     | MP     | Mz     | Mz+1   | Mw/Mn    |
|--------|--------|--------|--------|--------|----------|
| 251203 | 383046 | 429588 | 556214 | 740728 | 1.524846 |

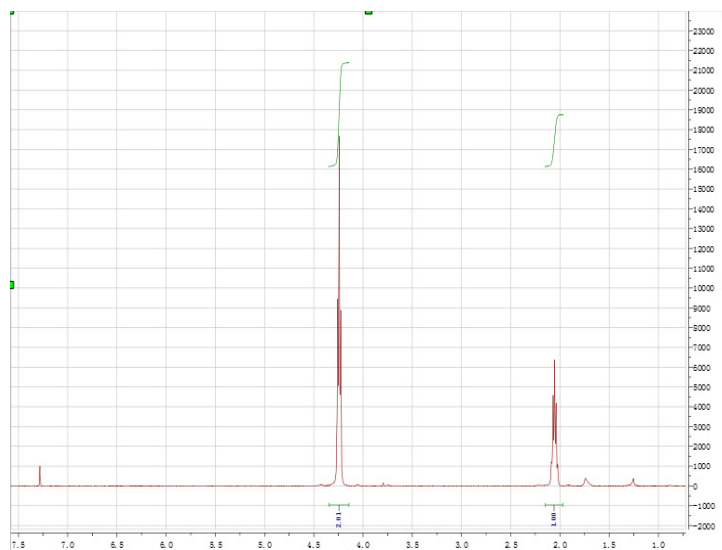

**Fig. S1.** GPC and  $^1\text{H}$  NMR of PTMC and PLA
